# Supplementary material
Source: ML conference proceedings conference paper supplement (https://openreview.net/forum?id=YwMHgqHYyT)

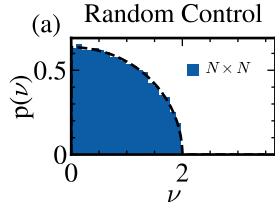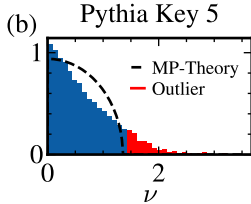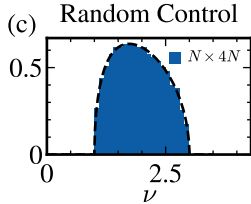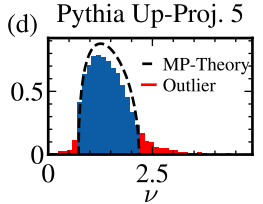

Supplement: supplementary_material [file Neurips_plot1.pdf › Code_Small_Singular_Values_Matter/Figures/Neurips_plot1.pdf]

Bert, Key 5

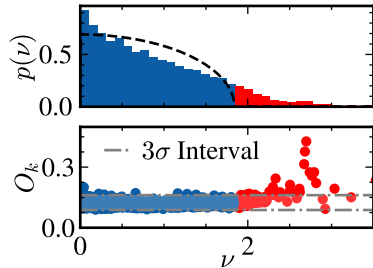

Pythia, Key 15

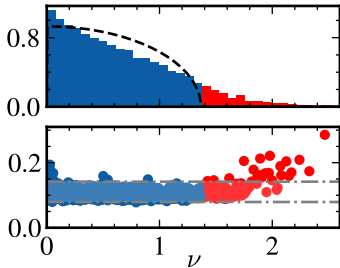

Llama, Query 25

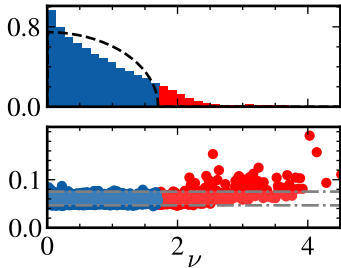

Supplement: supplementary_material [file Neurips_plot2.pdf › Code_Small_Singular_Values_Matter/Figures/Neurips_plot2.pdf]

Bert, Up-Proj. 5

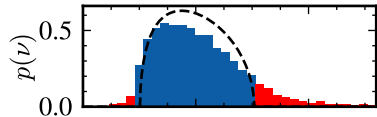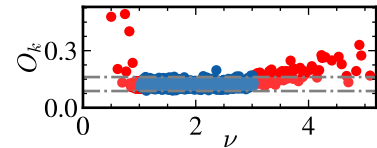

Pythia, Up-Proj. 15

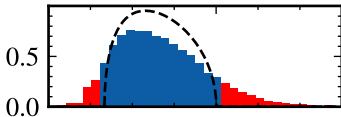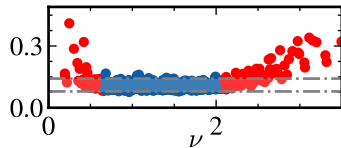

Llama, Up-Proj. 25

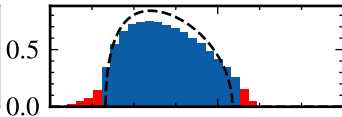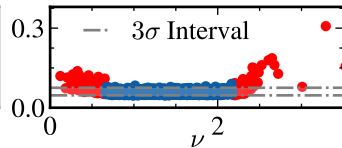

Supplement: supplementary_material [file Neurips_plot3.pdf › Code_Small_Singular_Values_Matter/Figures/Neurips_plot3.pdf]

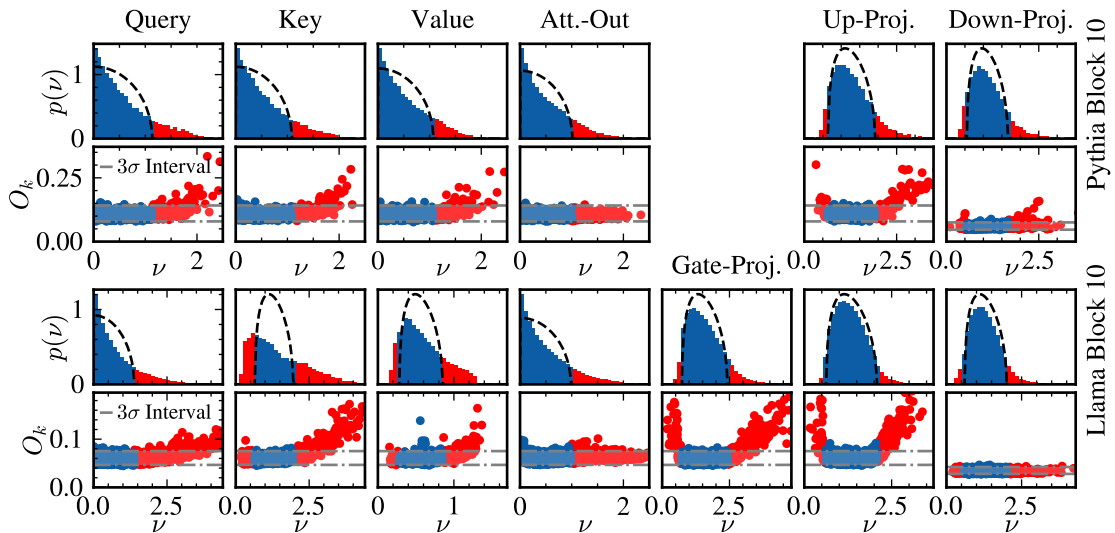

Supplement: supplementary_material [file Neurips_plot4.pdf › Code_Small_Singular_Values_Matter/Figures/Neurips_plot4.pdf]

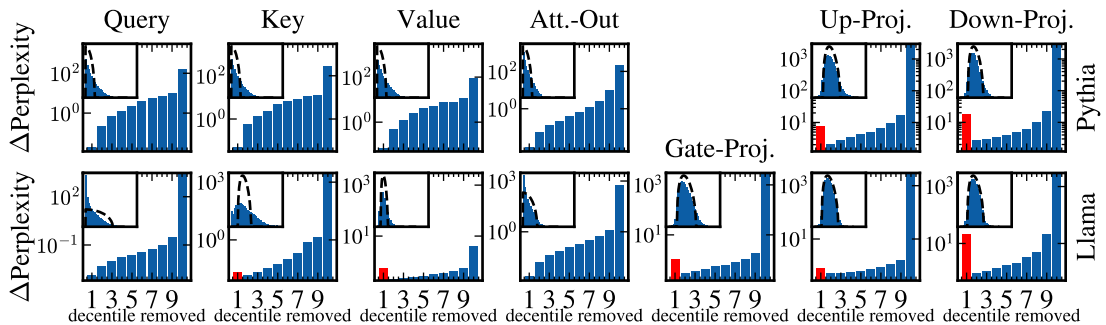

Supplement: supplementary_material [file Neurips_plot5.pdf › Code_Small_Singular_Values_Matter/Figures/Neurips_plot5.pdf]

reduce, finetune

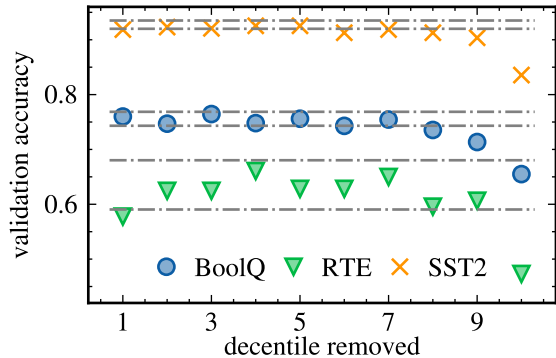

finetune, reduce

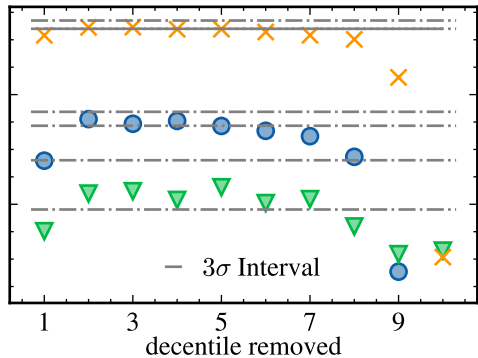

Supplement: supplementary_material [file Neurips_plot6.pdf › Code_Small_Singular_Values_Matter/Figures/Neurips_plot6.pdf]

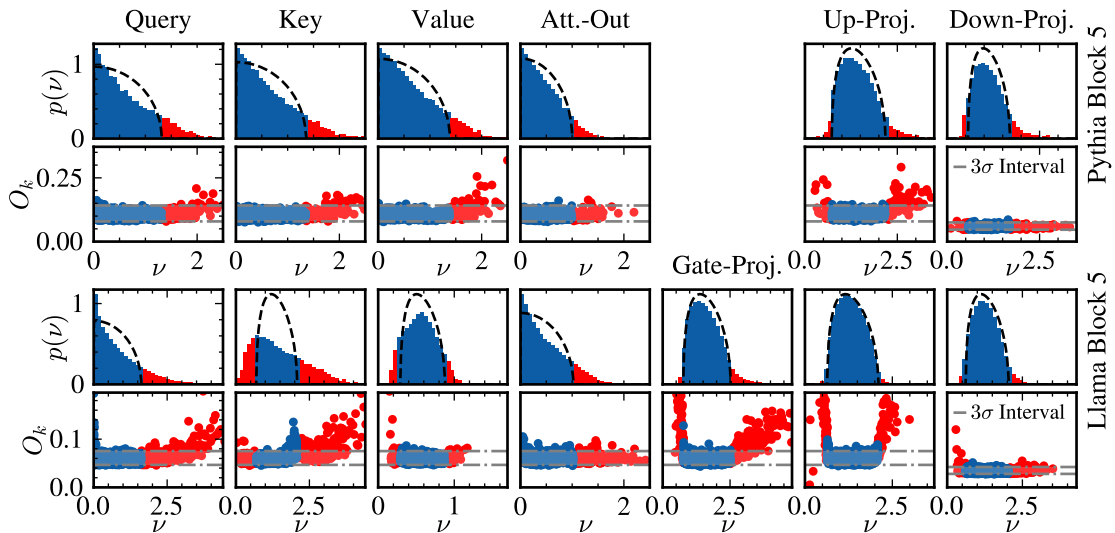

Supplement: supplementary_material [file Neurips_plotApp1.pdf › Code_Small_Singular_Values_Matter/Figures/Neurips_plotApp1.pdf]

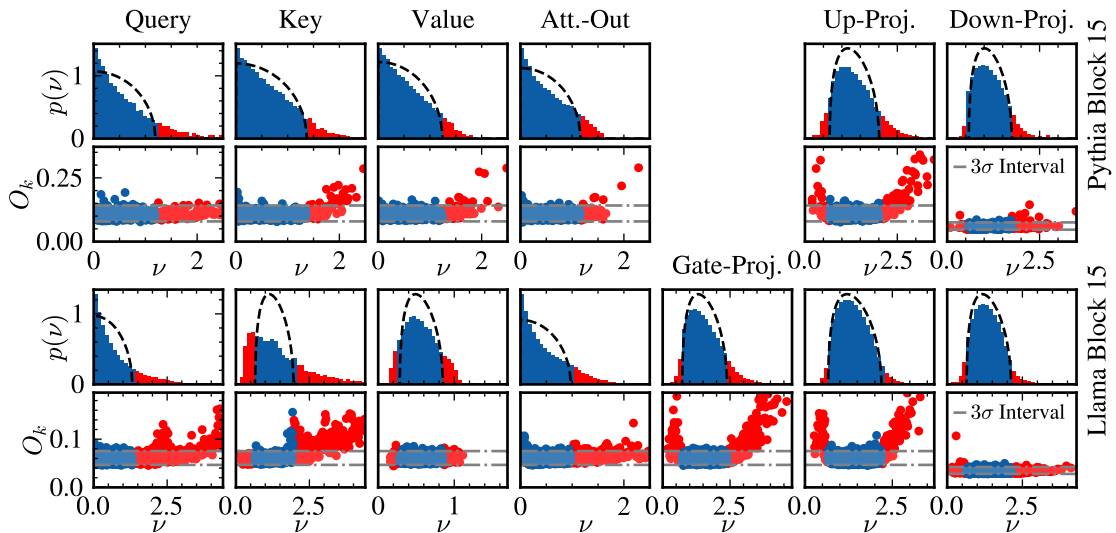

Supplement: supplementary_material [file Neurips_plotApp2.pdf › Code_Small_Singular_Values_Matter/Figures/Neurips_plotApp2.pdf]

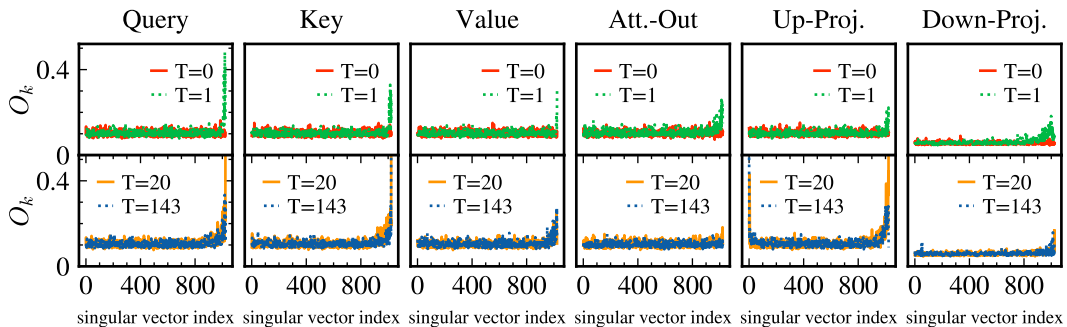

Supplement: supplementary_material [file Neurips_plotApp3.pdf › Code_Small_Singular_Values_Matter/Figures/Neurips_plotApp3.pdf]

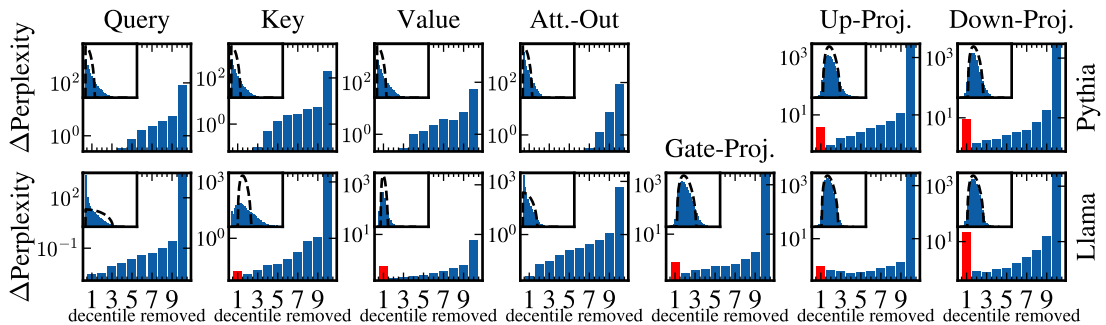

Supplement: supplementary_material [file Neurips_plotApp4.pdf › Code_Small_Singular_Values_Matter/Figures/Neurips_plotApp4.pdf]

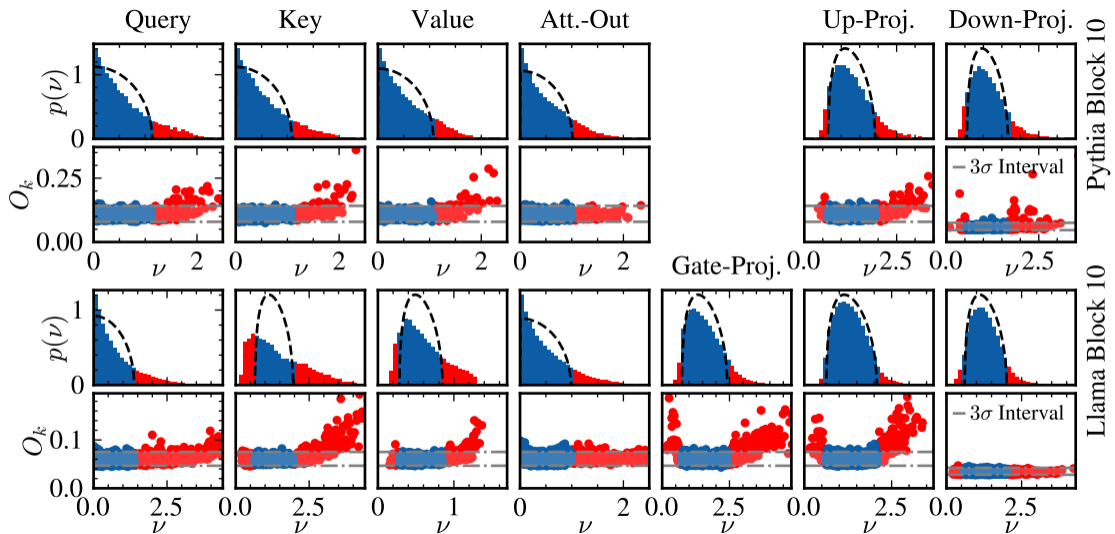

Supplement: supplementary_material [file Neurips_plotApp5.pdf › Code_Small_Singular_Values_Matter/Figures/Neurips_plotApp5.pdf]

Bert

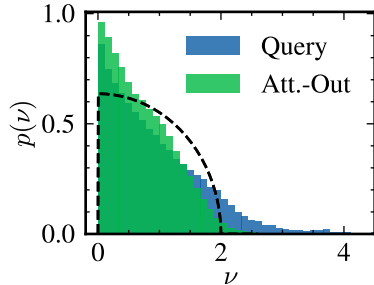

Pythia

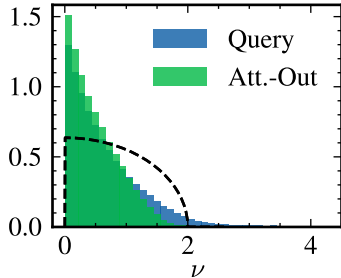

Llama

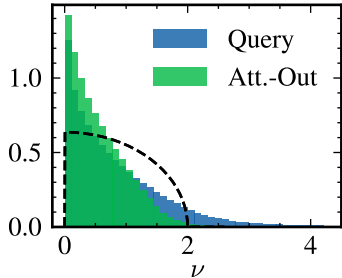

Supplement: supplementary_material [file Neurips_plotApp6.pdf › Code_Small_Singular_Values_Matter/Figures/Neurips_plotApp6.pdf]

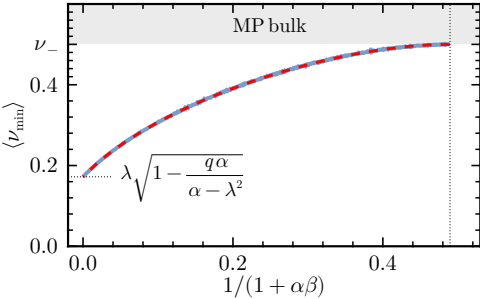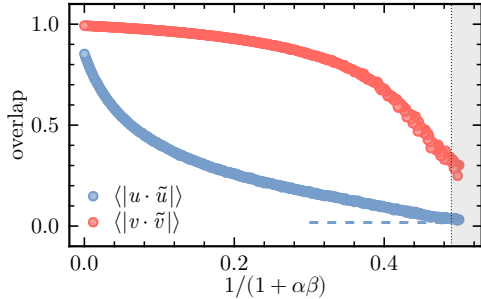

Supplement: supplementary_material [file Neurips_plot7.pdf › Code_Small_Singular_Values_Matter/TheoryModel/Neurips_plot7.pdf]
